# Supplementary material for: Molecular and Phenotypic Characterization of Staphylococcus epidermidis Isolates from Healthy Conjunctiva and a Comparative Analysis with Isolates from Ocular Infection
Source: PubMed Central journal article supplement (PMC4537226; doi:10.1371/journal.pone.0135964), 2015-08-14
Supplement: pone.0135964.s001.pdf [file pone.0135964.s001.pdf]

|             |              |           |          |   |   |   |   |          |          |          |          |          |          |          |          |          |          |          |              |   |
|-------------|--------------|-----------|----------|---|---|---|---|----------|----------|----------|----------|----------|----------|----------|----------|----------|----------|----------|--------------|---|
| <b>2022</b> | <b>U</b>     | <b>23</b> | <b>M</b> | - | - | - | - | <b>3</b> | <b>s</b> | <b>s</b> | <b>s</b> | <b>s</b> | <b>s</b> | <b>s</b> | <b>s</b> | <b>s</b> | <b>s</b> | <b>s</b> | <b>V</b>     | - |
| <b>63</b>   | <b>E</b>     | <b>16</b> | <b>L</b> | + | - | - | - | <b>2</b> | <b>s</b> | <b>s</b> | <b>R</b> | <b>s</b> | <b>s</b> | <b>s</b> | <b>R</b> | <b>s</b> | <b>s</b> | <b>s</b> | <b>III</b>   | + |
| <b>96</b>   | <b>E</b>     | <b>10</b> | <b>K</b> | + | - | - | + | <b>3</b> | <b>R</b> | <b>s</b> | <b>s</b> | <b>s</b> | <b>s</b> | <b>s</b> | <b>R</b> | <b>s</b> | <b>s</b> | <b>s</b> | <b>I, IV</b> | + |
| <b>90</b>   | <b>Ohers</b> | <b>87</b> | <b>F</b> | - | - | + | - | <b>3</b> | <b>s</b> | <b>s</b> | <b>s</b> | <b>s</b> | <b>s</b> | <b>s</b> | <b>R</b> | <b>s</b> | <b>s</b> | <b>s</b> | <b>I</b>     | + |
| <b>98</b>   | <b>E</b>     | <b>38</b> | <b>E</b> | - | - | - | - | <b>2</b> | <b>s</b> | <b>s</b> | <b>s</b> | <b>s</b> | <b>s</b> | <b>s</b> | <b>R</b> | <b>s</b> | <b>s</b> | <b>s</b> | <b>I</b>     | + |
| <b>1654</b> | <b>U</b>     | <b>71</b> | <b>D</b> | + | + | + | - | <b>1</b> | <b>s</b> | <b>s</b> | <b>s</b> | <b>s</b> | <b>s</b> | <b>s</b> | <b>s</b> | <b>s</b> | <b>s</b> | <b>s</b> | <b>I</b>     | + |
| <b>1655</b> | <b>C</b>     | <b>21</b> | <b>B</b> | + | - | - | - | <b>3</b> | <b>s</b> | <b>s</b> | <b>s</b> | <b>s</b> | <b>s</b> | <b>s</b> | <b>R</b> | <b>s</b> | <b>s</b> | <b>s</b> | <b>II</b>    | + |
| <b>1864</b> | <b>C</b>     | <b>57</b> | <b>L</b> | + | - | - | - | <b>3</b> | <b>s</b> | <b>s</b> | <b>s</b> | <b>s</b> | <b>s</b> | <b>s</b> | <b>s</b> | <b>s</b> | <b>s</b> | <b>s</b> | <b>V</b>     | + |
| <b>1948</b> | <b>C</b>     | <b>46</b> | <b>M</b> | + | - | + | + | <b>3</b> | <b>s</b> | <b>s</b> | <b>s</b> | <b>s</b> | <b>s</b> | <b>s</b> | <b>s</b> | <b>s</b> | <b>s</b> | <b>s</b> | <b>III</b>   | + |

C= conjunctivitis; E=endophthalmitis; U=ulcers.

Ox=oxacillin; Ci=ciprofloxacin; Of=ofloxacin; Le=levofloxacin; Mo=moxifloxacin; Ga=gatifloxacin; To=tobramycin;

Ch=chloramphenicol; Vancomycin.
