# Supplementary material for: Molecular and Phenotypic Characterization of Staphylococcus epidermidis Isolates from Healthy Conjunctiva and a Comparative Analysis with Isolates from Ocular Infection
Source: PubMed Central journal article supplement (PMC4537226; doi:10.1371/journal.pone.0135964), 2015-08-14
Supplement: pone.0135964.s002.pdf [file pone.0135964.s002.pdf]

|     |     |    |   |   |   |   |   |   |   |   |   |   |   |   |   |   |        |   |
|-----|-----|----|---|---|---|---|---|---|---|---|---|---|---|---|---|---|--------|---|
| 128 | 118 | L1 | - | - | - | - | 2 | R | S | S | S | S | S | S | R | S | I      | + |
| 144 | 118 | M1 | - | - | - | - | 3 | S | S | S | S | S | S | S | S | S | II     | + |
| 120 | 2   | K  | - | - | - | - | 3 | S | S | S | S | S | S | S | S | S | V      |   |
| 132 | 2   | A  | + | + | + | - | 2 | S | S | S | S | S | S | S | S | S | V      | + |
| 139 | 2   | A  | + | - | + | - | 2 | R | I | I | S | S | S | S | S | S | IV     | - |
| 11  | 4   | M  | + | + | + | - | 3 | R | S | S | S | S | R | S | R | I | II     | + |
| 92  | 4   | E1 | - | - | - | - | 1 | S | S | S | S | S | S | S | S | S | II     | + |
| 114 | 4   | H1 | - | - | - | - | 1 | S | S | S | S | S | S | S | S | S | I      | + |
| 30  | 9   | N1 | - | - | - | - | 1 | S | S | S | S | S | S | S | R | S | III    | + |
| 48  | 9   | O1 | - | - | - | + | 3 | R | S | S | S | I | S | R | R | S | II     | + |
| 152 | 9   | P1 | + | + | + | - | 2 | R | R | R | R | I | I | S | S | S | V      | - |
| 35  | 23  | N  | - | - | + | + | 1 | R | R | R | R | S | S | S | R | S | II     | - |
| 151 | 23  | J1 | + | + | + | - | 2 | R | S | S | S | S | S | S | S | S | IV     | - |
| 13  | 26  | Y  | + | + | + | - | 2 | R | S | S | R | R | R | R | S | S | II     | + |
| 17  | 135 | O1 | - | - | + | - | 2 | R | S | S | S | S | S | S | R | S | II, IV | + |
| 29  | 494 | P  | - | - | - | - | 2 | S | R | R | I | S | S | S | R | S | II     | + |
| 31  | 43  | D1 | + | + | + | - | 1 | S | S | S | S | S | S | S | S | S | IV     | + |
| 103 | 48  | Z  | + | + | + | - | 2 | S | S | S | S | S | S | I | I | S | II     | + |
| 131 | 173 | L1 | - | - | - | - | 3 | S | S | S | S | S | S | I | S | S | IV     | - |

Ox=oxacillin; Ci=ciprofloxacin; Of=ofloxacin; Le=levofloxacin; Mo=moxifloxacin; Ga=gatifloxacin; To=tobramycin;  
Ch=chloramphenicol; Vancomycin.
